# Supplementary material
Source: publisher site journal article supplement (https://arthropod-systematics.arphahub.com/article/82845/download/suppl/34/)
Supplement: Supplementary file 1

**Supplementary Table S2.** Morphological characters and their states coded for this phylogenetic analysis, from Pescador et al. (2009), except where noticed.

| Character                                                    | Character states                                                                                                                       |
|--------------------------------------------------------------|----------------------------------------------------------------------------------------------------------------------------------------|
| <i>Nymph</i>                                                 |                                                                                                                                        |
| 0. Frontal projection                                        | (0) absent (1) bilobed (2) non-bilobed                                                                                                 |
| 1. Genae                                                     | (0) not produced into spines (1) produced into spines                                                                                  |
| 2. Genal shelf (new)                                         | (0) not projected/less projected (1) projected                                                                                         |
| 3. Antennae (new)                                            | (0) short (1) long                                                                                                                     |
| 4. Compound eyes                                             | (0) non-stripped (1) stripped                                                                                                          |
| 5. Occipital tubercles (female)                              | (0) absent (1) present                                                                                                                 |
| 6. Mesonotal shield (new)                                    | (0) smooth (1) with projections and spines                                                                                             |
| 7. Lateral margins of mesonotal shield                       | (0) strongly divergent (1) nearly parallel                                                                                             |
| 8. Lateromedian lobe of mesonotal shield                     | (0) absent (1) weakly developed broadly rounded (2) well-developed subtriangular                                                       |
| 9. Lateral projections of mesonotal shield                   | (0) absent (1) length subequal to shorter than width at base (2) length 1.3-1.7x width at base (3) length 2x or more the width at base |
| 10. Dorsal projections of mesonotal shield                   | (0) absent (1) present, low elevated, broadly rounded (2) present, highly elevated, cone or peg shaped                                 |
| 11. Lateral margins of mesonotal shield                      | (0) smooth (1) finely denticulate (2) coarsely serrate                                                                                 |
| 12. Outlining/markings of ventral margin of mesonotal shield | (0) absent (1) present                                                                                                                 |
| 13. Length vs width of mesonotal shield                      | (0) length subequal to or shorter than width (1) length longer than width                                                              |
| 14. Pattern of speckling/ markings on mesonotal shield       | (0) banded (1) reticulate (2) finely checked or grainy (3) dotted                                                                      |
| 15. Apex of lateral projections of mesonotal shield          | (0) absent (1) blunt (2) tapered to pointed, if sclerotised, only at tip (3) pointed and heavily sclerotised                           |
| 16. Legs                                                     | (0) unicolorous (1) bicolorous                                                                                                         |
| 17. Tarsal claws                                             | (0) <1/2 length of tarsi (1) >1/2 length of tarsi                                                                                      |
| 18. Lateral margins of abdomen                               | (0) glabrous or with few short hairs (1) with long thick hairs                                                                         |
| 19. Posterolateral projections of abdominal segments VI-VIII | (0) weakly developed, apically blunt (1) well-developed, apically sharp pointed                                                        |
| 20. Dorsoventral shape of nymph                              | (0) compressed (1) distinctly convex                                                                                                   |
| <i>Adult</i>                                                 |                                                                                                                                        |
| 21. Shape of penes                                           | (0) triangular (1) subquadrangular                                                                                                     |
| 22. Penis lobes (new)                                        | (0) separated (1) not separated                                                                                                        |
| 23. First segment of forceps                                 | (0) with triangular projection on inner margin (1) without triangular projection on inner margin                                       |
| 24. Ratio forewing/hind wing (new)                           | (0) almost 1/2 (1) 1/3 (2) 1/4 (3) 1/5                                                                                                 |
| 25. Forewing colouration of imago                            | (0) entirely hyaline (1) basal 1/3-1/2 flushed with orange to reddish brown                                                            |
| 26. Forewing shape (new)                                     | (0) triangular (1) elongated/narrower                                                                                                  |
| 27. Crossveins of forewing (new)                             | (0) absent (1) present - prominent (2) present - not prominent                                                                         |
| 28. MA vein of forewing (new)                                | (0) unforked (1) forked                                                                                                                |
| 29. Hind wing colouration of imago                           | (0) entirely hyaline (1) basal 1/4-3/4 flushed with orange to reddish brown (2) almost entirely orange to reddish brown                |
| 30. Shape of hind wing (new)                                 | (0) oval (1) rounded                                                                                                                   |
| 31. Costal projection on hind wing (new)                     | (0) absent (1) present                                                                                                                 |
| 32. Middorsal transverse elevation in tergum VI (new)        | (0) absent (1) present                                                                                                                 |
| 33. Apical cleft in sternum IX (female) (new)                | (0) absent (1) present                                                                                                                 |
| 34. Prosternal bispinate projection (new)                    | (0) absent (1) present                                                                                                                 |
| 35. Each foreleg in male adult with (new)                    | (0) two blunt claws (1) single blunt claw                                                                                              |
